# Supplementary material
Source: PubMed Central journal article supplement (PMC2770873)
Supplement: NIHMS64101-supplement-1si20060315_02.pdf [file NIHMS64101-supplement-1si20060315_02.pdf]

**Application of the Goldilocks Effect to the Design of Potent and Selective  
Inhibitors of Phenylethanolamine *N*-Methyltransferase:  
Balancing  $pK_a$  and Steric Effects in the Optimization of 3-Methyl-1,2,3,4-  
tetrahydroisoquinoline Inhibitors by  $\beta$ -Fluorination.**

Gary L. Grunewald, Mitchell R. Seim, Jian Lu, Mariam Makboul, and Kevin R.

Criscione

Department of Medicinal Chemistry  
University of Kansas, Lawrence, KS 66045

**Content:**

Elemental Analysis of Compounds **11b–25b**, **14c**, **17c**, **23c**, and **25c**.

| Compound        | Formula                                                                                                | Calculated |      |       | Found |      |       |
|-----------------|--------------------------------------------------------------------------------------------------------|------------|------|-------|-------|------|-------|
|                 |                                                                                                        | C          | H    | N     | C     | H    | N     |
| <b>11b</b> ·HCl | C <sub>10</sub> H <sub>10</sub> BrF <sub>2</sub> N·HCl                                                 | 40.23      | 3.71 | 4.69  | 40.07 | 3.58 | 4.62  |
| <b>12b</b> ·HCl | C <sub>11</sub> H <sub>10</sub> F <sub>5</sub> NO <sub>2</sub> ·HCl                                    | 45.93      | 3.85 | 4.87  | 45.67 | 3.60 | 4.72  |
| <b>13b</b> ·HCl | C <sub>10</sub> H <sub>10</sub> F <sub>2</sub> IN·HCl                                                  | 34.76      | 3.21 | 4.05  | 34.76 | 2.97 | 3.96  |
| <b>14b</b> ·HCl | C <sub>12</sub> H <sub>13</sub> F <sub>3</sub> N <sub>2</sub> O <sub>2</sub> S·HCl                     | 37.85      | 3.71 | 7.36  | 37.69 | 3.58 | 7.15  |
| <b>15b</b> ·HCl | C <sub>10</sub> H <sub>10</sub> F <sub>2</sub> N <sub>2</sub> O <sub>2</sub> ·HCl                      | 45.38      | 4.19 | 10.58 | 45.38 | 4.04 | 10.54 |
| <b>16b</b> ·HCl | C <sub>10</sub> H <sub>12</sub> F <sub>2</sub> N <sub>2</sub> O <sub>2</sub> S·HCl                     | 40.20      | 4.39 | 9.38  | 40.40 | 4.23 | 9.24  |
| <b>17b</b> ·HCl | C <sub>16</sub> H <sub>15</sub> ClF <sub>2</sub> N <sub>2</sub> O <sub>2</sub> S·HCl·¼H <sub>2</sub> O | 46.44      | 4.02 | 6.77  | 46.30 | 3.83 | 6.65  |
| <b>18b</b> ·HCl | C <sub>11</sub> H <sub>10</sub> F <sub>2</sub> N <sub>2</sub> ·HBr                                     | 45.70      | 3.83 | 9.69  | 45.65 | 3.75 | 9.55  |
| <b>19b</b> ·HCl | C <sub>10</sub> H <sub>11</sub> F <sub>2</sub> N·HBr                                                   | 45.48      | 4.58 | 5.30  | 45.64 | 4.57 | 5.22  |
| <b>20b</b> ·HCl | C <sub>11</sub> H <sub>13</sub> F <sub>2</sub> NO <sub>2</sub> S·HCl                                   | 44.37      | 4.74 | 4.70  | 44.46 | 4.67 | 4.58  |
| <b>21b</b> ·HCl | C <sub>12</sub> H <sub>16</sub> F <sub>2</sub> N <sub>2</sub> O <sub>2</sub> S·HCl                     | 44.10      | 5.24 | 8.57  | 44.11 | 5.03 | 8.38  |
| <b>22b</b> ·HCl | C <sub>13</sub> H <sub>18</sub> F <sub>2</sub> N <sub>2</sub> O <sub>2</sub> S·HCl                     | 45.81      | 5.62 | 8.22  | 45.86 | 5.47 | 8.04  |
| <b>23b</b> ·HCl | C <sub>14</sub> H <sub>21</sub> F <sub>2</sub> N <sub>2</sub> O <sub>3</sub> S·HCl                     | 45.34      | 5.71 | 7.55  | 45.34 | 5.68 | 7.48  |
| <b>24b</b> ·HCl | C <sub>14</sub> H <sub>20</sub> F <sub>2</sub> N <sub>2</sub> O <sub>2</sub> S·HCl                     | 47.39      | 5.97 | 7.89  | 47.42 | 5.77 | 7.79  |
| <b>25b</b> ·HCl | C <sub>16</sub> H <sub>15</sub> F <sub>2</sub> N <sub>3</sub> O <sub>4</sub> S·HCl·¼H <sub>2</sub> O   | 45.29      | 3.92 | 9.90  | 45.35 | 3.79 | 9.78  |
| <b>14c</b> ·HCl | C <sub>12</sub> H <sub>12</sub> F <sub>6</sub> N <sub>2</sub> O <sub>2</sub> S·HCl                     | 36.14      | 3.29 | 7.03  | 36.30 | 3.17 | 6.91  |
| <b>17c</b> ·HCl | C <sub>16</sub> H <sub>14</sub> ClF <sub>3</sub> N <sub>2</sub> O <sub>2</sub> S·HCl                   | 44.98      | 3.54 | 6.56  | 45.07 | 3.47 | 6.46  |
| <b>23c</b> ·HCl | C <sub>14</sub> H <sub>20</sub> F <sub>3</sub> N <sub>2</sub> O <sub>3</sub> S·HCl                     | 47.72      | 5.43 | 7.95  | 47.76 | 5.14 | 7.85  |
| <b>25c</b> ·HCl | C <sub>16</sub> H <sub>14</sub> F <sub>3</sub> N <sub>3</sub> O <sub>4</sub> S·HCl                     | 44.68      | 4.37 | 8.68  | 44.44 | 4.32 | 8.48  |
